# Supplementary material
Source: PubMed Central journal article supplement (PMC4829460)
Supplement: NIHMS772547-supplement-supporting.pdf [file NIHMS772547-supplement-supporting.pdf]

## SUPPORTING INFORMATION

### Supporting Tables and Figures

**Table S1.** Primers used for all cloning described in the Experimental Procedures. The bold and underlined nucleotides indicate the codon mutated to alanine.

| Primer Name   | Sequence                                                                                                               |
|---------------|------------------------------------------------------------------------------------------------------------------------|
| C104A         | Forward 5'-gcctgaacgctgcccacgac <b><u>gct</u></b> aatctgcgctgcaaataattgtttgc-3'                                        |
|               | Reverse 5'-gcaaaacaatatttcagcgcagatt <b><u>agc</u></b> gctcgtgggcgacgttcaggc-3'                                        |
| C104/108/111A | Forward 5'-cccacgac <b><u>gct</u></b> aatctgcgc <b><u>gcc</u></b> aaatat <b><u>gct</u></b> tttccagcaccggtaattcaagg-3'  |
|               | Reverse 5'-ccttgaaattaccggtgctggcaaa <b><u>agc</u></b> atatt <b><u>ggc</u></b> gcgagatt <b><u>agc</u></b> gctcgtggg-3' |
| C400A         | Forward 5'-cgacatctataaacgtgaaga <b><u>ggc</u></b> caaattgttgggctcgc-3'                                                |
|               | Reverse 5'-gcgagcccaacaatttc <b><u>ggc</u></b> tcttcacgtttatagatgctg-3'                                                |
| C409A         | Forward 5'-gcaaattgttgggctcgtttat <b><u>gct</u></b> ctggcggttgttcgc-3'                                                 |
|               | Reverse 5'-gcaaacaaccgccag <b><u>agg</u></b> cataaaagcgagcccaacaattgc-3'                                               |
| C400/403/409A | Forward 5'-cgtgaaga <b><u>ggc</u></b> caaatt <b><u>gct</u></b> tgggctcgtttat <b><u>gcc</u></b> -3'                     |
|               | Reverse 5'- <b><u>ggc</u></b> cataaaagcgagccca <b><u>agg</u></b> catttc <b><u>ggc</u></b> tcttcacg-3'                  |
| C344A         | Forward 5'-gcatcaaaaagcgcctgcagg <b><u>gct</u></b> ggtgcaggcttcgaatatattgc-3'                                          |
|               | Reverse 5'-gcaatatattcgaagcctgcacc <b><u>agc</u></b> gccctgcaggcgtttttgatgc-3'                                         |
| C362A         | Forward 5'-cggatgaagaaatctacc <b><u>ggc</u></b> caccaattgttggtattgaagaattcaaactgg-3'                                   |
|               | Reverse 5'-ccagttgaattcttcaataccaacaattggt <b><u>ggc</u></b> gggtagattcttcacccg-3'                                     |
| C413A         | Forward 5'-cgctttattgctctggcggt <b><u>gct</u></b> ttcgcaacaactacaacatcaacgg-3'                                         |
|               | Reverse 5'-ccgttgatggttagttgttcgaa <b><u>agc</u></b> accgccagagcaataaaagcg-3'                                          |
| C409/413A     | Forward 5'-cgctttat <b><u>gct</u></b> ctggcggt <b><u>gct</u></b> ttcgcaacaactacaacatcaacgg-3'                          |
|               | Reverse 5'-ccgttgatggttagttgttcgaa <b><u>agc</u></b> accgccag <b><u>agg</u></b> cataaaagcg-3'                          |

**Table S2.** Monoisotopic masses corresponding to the peaks of the various charge states with the associated ppm error from the mass spectrum of unmodified Tte1186a (**Fig. 4A, black**) and modified Tte1186a (**Fig. 4A, red**) isolated from the reaction not treated with iodoacetamide. The masses observed in the spectrum of unmodified Tte1186a were consistent with the peptide containing six reduced cysteine residues, while the observed masses in the spectrum of modified Tte1186a were consistent with the loss of two hydrogen atoms.

| Charge State | Unmodified Tte1186a (black spectrum) |                                 |             | Modified Tte1186a (red spectrum) |                                 |             |
|--------------|--------------------------------------|---------------------------------|-------------|----------------------------------|---------------------------------|-------------|
|              | Observed [M+nH] <sup>n+</sup>        | Calculated [M+nH] <sup>n+</sup> | Error (ppm) | Observed [M+nH] <sup>n+</sup>    | Calculated [M+nH] <sup>n+</sup> | Error (ppm) |
| 4            | 1777.8408                            | 1777.8419                       | 0.62        | 1777.3321                        | 1777.3380                       | 3.32        |
| 5            | 1422.4745                            | 1422.4750                       | 0.35        | 1422.0676                        | 1422.0719                       | 3.02        |
| 6            | 1185.5631                            | 1185.5637                       | 0.51        | 1185.2243                        | 1185.2278                       | 2.95        |
| 7            | 1016.3408                            | 1016.3414                       | 0.59        | 1016.0506                        | 1016.0534                       | 2.76        |
| 8            | 889.4245                             | 889.4246                        | 0.11        | 889.1708                         | 889.1726                        | 2.02        |
| 9            | 790.7117                             | 790.7116                        | 0.13        | 790.4855                         | 790.4876                        | 2.66        |
| 10           | 711.7401                             | 711.7411                        | 1.41        | 711.5355                         | 711.5396                        | 5.76        |

**Table S3.** Monoisotopic masses corresponding to the peaks of the various charge states with the associated ppm error from the mass spectrum of unmodified Tte1186a (**Fig. 4B, black**) or modified Tte1186a (**Fig. 4B, red**) isolated from reactions that were subsequently treated with iodoacetamide. The masses of the peaks in the spectrum of unmodified Tte1186a were consistent with Tte1186a containing six carbamidomethylated cysteine residues, while the masses in the spectrum of modified Tte1186a were consistent with peptide missing two hydrogen atoms and containing only five carbamidomethylated cysteine residues.

| Charge State | Unmodified Tte1186a (black spectrum) |                                 |             | Modified Tte1186a (red spectrum) |                                 |             |
|--------------|--------------------------------------|---------------------------------|-------------|----------------------------------|---------------------------------|-------------|
|              | Observed [M+nH] <sup>n+</sup>        | Calculated [M+nH] <sup>n+</sup> | Error (ppm) | Observed [M+nH] <sup>n+</sup>    | Calculated [M+nH] <sup>n+</sup> | Error (ppm) |
| 4            | 1863.3894                            | 1863.3741                       | 8.21        | 1848.6252                        | 1848.6148                       | 5.63        |
| 5            | 1490.9087                            | 1490.9007                       | 5.37        | 1479.0985                        | 1479.0933                       | 3.52        |
| 6            | 1242.5912                            | 1242.5852                       | 4.83        | 1232.7507                        | 1232.7456                       | 4.14        |
| 7            | 1065.2221                            | 1065.2169                       | 4.88        | 1056.7865                        | 1056.783                        | 3.31        |
| 8            | 932.1949                             | 932.1907                        | 4.51        | 924.8140                         | 924.8110                        | 3.24        |
| 9            | 828.7314                             | 828.7259                        | 6.64        | 822.1693                         | 822.1662                        | 3.77        |
| 10           | 745.9575                             | 745.9540                        | 4.69        | 740.0540                         | 740.0503                        | 5.00        |

**Table S4.** Comparison of the observed and calculated monoisotopic masses of the various charge states of each *b*- or *y*-ion and the associated ppm error from the MS/MS fragmentation of the + 8 charge state of unmodified Tte1186a (**Fig. 5A**) and modified Tte1186a (**Fig. 5B**). The fragments corresponding to *b*51 through *b*54 and *y*10 through *y*13 were not detected (n.d.) in the CID fragmentation mass spectrum of the modified peptide. The (\*) indicates the calculated *m/z* corresponds to the theoretical mass of the Tte1186a peptide minus two hydrogens and one carbamidomethyl group relative to the unmodified peptide.

| Ion                           | Charge | unmodified Tte1186a (black) |                          |                | modified Tte1186a (red) |                          |                |
|-------------------------------|--------|-----------------------------|--------------------------|----------------|-------------------------|--------------------------|----------------|
|                               |        | Observed<br><i>m/z</i>      | Calculated<br><i>m/z</i> | Error<br>(ppm) | Observed<br><i>m/z</i>  | Calculated<br><i>m/z</i> | Error<br>(ppm) |
| <i>b</i> 5                    | 1      |                             |                          |                | 506.2117                | 506.2106                 | 2.2            |
| <i>b</i> 5 -H <sub>2</sub> O  | 1      |                             |                          |                | 488.2012                | 488.2001                 | 2.3            |
| <i>b</i> 6                    | 1      |                             |                          |                | 643.2711                | 643.2695                 | 2.5            |
| <i>b</i> 7                    | 1      |                             |                          |                | 780.3304                | 780.3284                 | 2.5            |
| <i>b</i> 7 -H <sub>2</sub> O  | 1      |                             |                          |                | 762.3197                | 762.3179                 | 2.5            |
| <i>b</i> 8                    | 2      |                             |                          |                | 459.1984                | 459.1973                 | 2.3            |
| <i>b</i> 9                    | 2      |                             |                          |                | 527.7280                | 527.7268                 | 2.3            |
| <i>b</i> 10 -H <sub>2</sub> O | 2      |                             |                          |                | 562.2388                | 562.2375                 | 2.4            |
| <i>b</i> 21                   | 3      |                             |                          |                | 773.7043                | 773.7022                 | 2.6            |
| <i>b</i> 36                   | 5      |                             |                          |                | 817.2419                | 817.2399                 | 2.5            |
| <i>b</i> 42                   | 6      |                             |                          |                | 785.9136                | 785.9118                 | 2.4            |
| <i>b</i> 44                   | 6      |                             |                          |                | 833.9286                | 833.9266                 | 2.4            |
| <i>b</i> 45                   | 6      | 845.7674                    | 845.7661                 | 1.5            | 845.7682                | 845.7661                 | 2.4            |
| <i>b</i> 46                   | 6      |                             |                          |                | 860.2737                | 860.2715                 | 2.6            |
| <i>b</i> 46 -H <sub>2</sub> O | 6      |                             |                          |                | 857.2719                | 857.2697                 | 2.6            |
| <i>b</i> 47                   | 6      |                             |                          |                | 886.9455                | 886.9433                 | 2.5            |
| <i>b</i> 48                   | 7      |                             |                          |                | 778.6771                | 778.6751                 | 2.6            |
| <i>b</i> 48                   | 6      | 908.2870                    | 908.2864                 | 0.7            |                         |                          |                |
| <i>b</i> 49                   | 7      | 791.1088                    | 791.1082                 | 0.8            | 791.1100                | 791.1082                 | 2.3            |
| <i>b</i> 49 -H <sub>2</sub> O | 7      |                             |                          |                | 788.5375                | 788.5353                 | 2.8            |
| <i>b</i> 50                   | 7      | 801.2584                    | 801.2564                 | 2.5            | 801.2581                | 801.2564                 | 2.2            |
| <i>b</i> 50                   | 6      | 934.6336                    | 934.6312                 | 2.6            |                         |                          |                |
| <i>b</i> 50                   | 5      |                             |                          |                | 1121.3591               | 1121.3560                | 2.8            |
| <i>b</i> 50 -H <sub>2</sub> O | 7      | 798.6805                    | 798.6834                 | 3.6            | 798.6854                | 798.6834                 | 2.4            |
| <i>b</i> 51                   | 7      | 824.1167                    | 824.1179                 | 1.5            | n.d.                    | 815.8280*                |                |
| <i>b</i> 52                   | 7      | 842.4186                    | 842.4172                 | 1.7            | n.d.                    | 834.1273*                |                |
| <i>b</i> 52 -NH <sub>3</sub>  | 7      | 839.9870                    | 839.9848                 | 2.6            | n.d.                    | 831.6949*                |                |
| <i>b</i> 53                   | 7      | 856.8540                    | 856.8526                 | 1.6            | n.d.                    | 848.5627*                |                |
| <i>b</i> 53 -H <sub>2</sub> O | 7      | 854.2805                    | 854.2796                 | 1.1            | n.d.                    | 845.9897*                |                |
| <i>b</i> 54                   | 7      | 869.2875                    | 869.2857                 | 2.1            | n.d.                    | 860.9958*                |                |
| <i>b</i> 54 -H <sub>2</sub> O | 7      | 866.7145                    | 866.7128                 | 2.0            | n.d.                    | 858.4229*                |                |
| <i>b</i> 55                   | 7      | 892.1492                    | 892.1472                 | 2.2            | 883.7172*               | 883.7133*                | 4.4            |

|                              |   |           |           |     |            |            |     |
|------------------------------|---|-----------|-----------|-----|------------|------------|-----|
| <i>b55</i>                   | 6 | 1040.6715 | 1040.6705 | 1.0 |            |            |     |
| <i>b55</i> -H <sub>2</sub> O | 7 | 889.5768  | 889.5743  | 2.8 |            |            |     |
| <i>b56</i>                   | 7 | 906.5846  | 906.5826  | 2.2 | 898.1514*  | 898.1487*  | 3   |
| <i>b56</i>                   | 6 | 1057.5139 | 1057.5118 | 2.0 | 1047.6749* | 1047.6723* | 2.5 |
| <i>b56</i> -H <sub>2</sub> O | 7 | 904.0114  | 904.0097  | 1.9 | 895.5783*  | 895.5758*  | 2.8 |
| <i>b56</i> -H <sub>2</sub> O | 6 | 1054.5123 | 1054.5101 | 2.1 | 1044.6731* | 1044.6705* | 2.4 |
| <i>b57</i>                   | 7 | 920.7371  | 920.7352  | 2.1 | 912.3034*  | 912.3014*  | 2.3 |
| <i>b57</i>                   | 6 | 1074.0251 | 1074.0232 | 1.8 | 1064.1862* | 1064.1837* | 2.3 |
| <i>b57</i> -H <sub>2</sub> O | 7 | 918.1632  | 918.1623  | 1.0 | 909.7306*  | 909.7284*  | 2.4 |
| <i>b57</i> -NH <sub>3</sub>  | 6 |           |           |     | 1061.3516* | 1061.3459* | 5.3 |
| <i>b57</i> -H <sub>2</sub> O | 6 | 1071.0231 | 1071.0215 | 1.5 |            |            |     |
| <i>b58</i>                   | 6 | 1083.5285 | 1083.5268 | 1.6 | 1073.6898* | 1073.6873* | 2.3 |
| <i>b59</i>                   | 7 | 945.1748  | 945.1730  | 1.9 | 936.7413*  | 936.7391*  | 2.3 |
| <i>b59</i>                   | 6 | 1102.5367 | 1102.5340 | 2.4 | 1092.6972* | 1092.6944* | 2.6 |
| <i>b59</i> -NH <sub>3</sub>  | 7 | 942.7431  | 942.7406  | 2.7 |            |            |     |
| <i>b60</i>                   | 8 |           |           |     | 835.7823*  | 835.7800*  | 2.8 |
| <i>b60</i>                   | 7 | 963.4687  | 963.4671  | 1.7 | 955.0355*  | 955.0332*  | 2.4 |
| <i>b60</i>                   | 6 | 1123.8801 | 1123.8771 | 2.7 | 1114.0402* | 1114.0375* | 2.4 |
| <i>b60</i> -H <sub>2</sub> O | 6 |           |           |     | 1111.0382* | 1111.0358* | 2.2 |
| <i>b60</i> -NH <sub>3</sub>  | 7 | 961.0365  | 961.0347  | 1.9 | 952.6056*  | 952.6008*  | 5   |
| <i>b61</i>                   | 8 |           |           |     | 851.9124*  | 851.9103*  | 2.5 |
| <i>b61</i>                   | 7 | 981.9034  | 981.9017  | 1.7 | 973.4703*  | 973.4679*  | 2.5 |
| <i>b61</i>                   | 6 | 1145.3859 | 1145.3842 | 1.5 | 1135.5473* | 1135.5446* | 2.4 |
| <i>b61</i> -NH <sub>3</sub>  | 7 | 979.4731  | 979.4694  | 3.8 |            |            |     |
| <i>b61</i> -H <sub>2</sub> O | 7 |           |           |     | 970.8971*  | 970.8949*  | 2.2 |
| <i>b61</i> -NH <sub>3</sub>  | 8 |           |           |     | 849.7847*  | 849.7820*  | 3.3 |
| <i>b61</i> -NH <sub>3</sub>  | 6 |           |           |     | 1132.7105* | 1132.7069* | 3.2 |
| <i>b62</i>                   | 7 |           |           |     | 996.3316*  | 996.3294*  | 2.2 |
| <i>b62</i> -NH <sub>3</sub>  | 8 |           |           |     | 869.7894*  | 869.7858*  | 4.1 |
| <i>b62</i> -NH <sub>3</sub>  | 7 | 1002.3337 | 1002.3309 | 2.8 | 993.9017*  | 993.8970*  | 4.7 |
| <i>b63</i>                   | 8 | 895.3010  | 895.3011  | 0.1 | 887.9237*  | 887.9214*  | 2.5 |
| <i>b63</i>                   | 7 | 1023.0596 | 1023.0573 | 2.2 | 1014.6258* | 1014.6235* | 2.3 |
| <i>b63</i>                   | 6 |           |           |     | 1183.5623* | 1183.5595* | 2.4 |
| <i>b63</i> -NH <sub>3</sub>  | 8 |           |           |     | 885.7976*  | 885.7931*  | 5   |
| <i>b63</i> -NH <sub>3</sub>  | 7 | 1020.6293 | 1020.6250 | 4.2 | 1012.1959* | 1012.1911* | 4.8 |
| <i>b64</i>                   | 8 | 915.6858  | 915.6840  | 2.0 | 908.3070*  | 908.3044*  | 2.9 |
| <i>b64</i>                   | 7 |           |           |     | 1037.9208* | 1037.9182* | 2.5 |
| <i>b64</i> -H <sub>2</sub> O | 8 | 913.4333  | 913.4327  | 0.7 | 906.0557*  | 906.0530*  | 2.9 |
| <i>b64</i> -NH <sub>3</sub>  | 7 |           |           |     | 1035.4890* | 1035.4859* | 3.1 |
| <i>y2</i>                    | 1 | 296.1246  | 296.1241  | 1.7 | 296.1248   | 296.1241   | 2.5 |
| <i>y2</i> -NH <sub>3</sub>   | 1 |           |           |     | 279.0982   | 279.0975   | 2.4 |
| <i>y3</i>                    | 1 | 424.1835  | 424.1827  | 1.9 | 424.1837   | 424.1827   | 2.4 |
| <i>y3</i> -H <sub>2</sub> O  | 1 | 406.1729  | 406.1721  | 2.0 |            |            |     |

|                       |   |           |           |     |            |            |     |
|-----------------------|---|-----------|-----------|-----|------------|------------|-----|
| y4                    | 1 | 584.2144  | 584.2133  | 1.9 | 584.2147   | 584.2133   | 2.4 |
| y4 -H <sub>2</sub> O  | 1 | 566.2036  | 566.2028  | 1.4 |            |            |     |
| y4 -NH <sub>3</sub>   | 1 | 567.1878  | 567.1868  | 1.8 | 567.1880   | 567.1868   | 2.1 |
| y5                    | 1 | 713.2574  | 713.2559  | 2.1 | 713.2577   | 713.2559   | 2.5 |
| y5 -H <sub>2</sub> O  | 1 | 695.2467  | 695.2454  | 1.9 | 695.2470   | 695.2454   | 2.3 |
| y5 -NH <sub>3</sub>   | 1 |           |           |     | 696.2311   | 696.2294   | 2.5 |
| y6                    | 1 | 841.3160  | 841.3145  | 1.8 | 841.3165   | 841.3145   | 2.4 |
| y6 -H <sub>2</sub> O  | 1 | 823.3059  | 823.3039  | 2.4 | 823.3061   | 823.3039   | 2.6 |
| y6 -NH <sub>3</sub>   | 1 |           |           |     | 824.2901   | 824.2879   | 2.6 |
| y7                    | 1 | 955.3593  | 955.3574  | 2.0 | 955.3600   | 955.3574   | 2.7 |
| y8                    | 1 | 1012.3810 | 1012.3789 | 2.1 | 1012.3814  | 1012.3789  | 2.5 |
| y8 -H <sub>2</sub> O  | 1 |           |           |     | 994.3708   | 994.3683   | 2.5 |
| y8 -NH <sub>3</sub>   | 1 | 995.3537  | 995.3523  | 1.4 | 995.3549   | 995.3523   | 2.6 |
| y9                    | 1 | 1111.4498 | 1111.4473 | 2.2 | 1111.4502  | 1111.4473  | 2.6 |
| y10                   | 1 | 1212.4981 | 1212.4950 | 2.6 | n.d.       | 1211.4872* |     |
| y11                   | 1 | 1372.5291 | 1372.5256 | 2.6 | n.d.       | 1371.5178* |     |
| y12                   | 1 | 1459.5605 | 1459.5577 | 1.9 | n.d.       | 1458.5498* |     |
| y13                   | 1 | 1560.6111 | 1560.6053 | 3.7 | n.d.       | 1559.5975* |     |
| y15                   | 2 |           |           |     | 895.3530*  | 895.3506*  | 2.8 |
| y19                   | 2 |           |           |     | 1118.4328* | 1118.4297* | 2.8 |
| y20                   | 2 |           |           |     | 1161.9490* | 1161.9458* | 2.8 |
| y53 -H <sub>2</sub> O | 7 | 879.1475  | 879.1405  | 8.0 |            |            |     |
| y61 -H <sub>2</sub> O | 8 |           |           |     | 876.5478*  | 876.5417*  | 6.9 |
| y61 -H <sub>2</sub> O | 7 | 1010.0576 | 1010.0519 | 5.6 | 1001.6247* | 1001.6180* | 6.7 |

**Table S5.**  $g$ -values of the EPR spectra determined by the data simulations.

| <b>Variant</b> | <b>SAM</b> | <b><math>g_1</math></b> | <b><math>g_2</math></b> | <b><math>g_3</math></b> | <b><math>\sigma_1</math></b> | <b><math>\sigma_2</math></b> | <b><math>\sigma_3</math></b> |
|----------------|------------|-------------------------|-------------------------|-------------------------|------------------------------|------------------------------|------------------------------|
| RC             | –          | 2.0405                  | 1.9190                  | 1.9055                  | 0.0350                       | 0.0324                       | 0.0579                       |
| RC             | +          | 1.9925                  | 1.8950                  | 1.8400                  | 0.0190                       | 0.0280                       | 0.0350                       |
| AC1a           | +/-        | 2.0631                  | 1.9322                  | 1.8799                  | 0.0712                       | 0.0270                       | 0.1145                       |
| AC1b           | +/-        | 2.0221                  | 1.9509                  | 1.900                   | 0.0274                       | 0.0166                       | 0.0354                       |
| AC2a           | +/-        | 2.0500                  | 1.9255                  | 1.8865                  | 0.0470                       | 0.0367                       | 0.0556                       |
| AC2b           | +/-        | 2.0850                  | 1.9397                  | 1.8672                  | 0.0330                       | 0.0152                       | 0.1197                       |

**Figure S1.** *Caldanaerobacter subterraneus* subsp. *tengcongensis* MB4 *tte1186* (a) and *tte1186a* (c) nucleotide sequences optimized for recombinant expression in *E. coli*. The corresponding protein sequences for Tte1186 and Tte1186a are shown in (b) and (d) respectively. The nucleotide sequences in bold represent the *NdeI* and *XhoI* restriction endonuclease sites that were used to clone the gene into pET28a. The start and stop codons are shown in italic. The underlined sequence corresponds to the His<sub>6</sub> purification tag.

a) ATGGGCAGCAGCCATCATCATCATCACAGCAGCGGCCTGGTGCCGCGCGGCAGCC**CATATG**TCGGC  
TACCATGCATAAGTTTAAAGCGTCTGGGCCTGAATATCGTTGTTGATCCGGTTTCGGGCGCAATCCACG  
TCGTTGATGACGTGGTTTACGATGTCCTGGACTATTACGAAAACCATAGTCGTGAAGAAATCGTTAAT  
CTGCTGAAGGATAAGTACAAAGAAGAAGACATCCTGGAAGCGATCTCCGAAGTGGATGAACTGAAGGG  
CAACGGTCTGCTGTTTACCGAAGATATTTACAAAGACATTGCGATCAGTCGTGCCGATTCCGTTATCA  
AAGCGATGTGCCTGAACGTGCCCCACGACTGTAATCTGCGCTGCAAATATTGTTTTGCCAGCACCGGT  
AATTTCAAGGGCGGTTCGTAAGTATGATGGATTTTGAACGGGTTCGCAAAGCGATTGACTTCCTGATCAA  
GAGCTCTGGCAAACGTGCAACATTGAAATCGATTTCTTTGGCGGTGAACCGTCTGTAATTTGAAG  
TCGTGAAACAGCTGGTTGAATACGGCAAGCAAAAAGCGAAGGAAAACAAAAAGAATATCAAGTTCACC  
ATCACCACGAACGCCGTTCTGCTGGATGACGAAAAGATCGAATACTTCAACGAAAACCTTCTCAAACGT  
TGTCCTGTGCTGGATGGCCGCAAAGAAGTCAATGACCAGATGCGTGTGCGTGCAGATGGTAGCGGCA  
CGTACGACGTCATTGTGCCGAAAATCCAAAAGTTTGTGAAAGCGCGTGGTAAAAAGGAATATTACGTT  
CGCGGCACCTTTACGGCGAAAATCTGGATTTTCGTTGAAGACGTCCTGCATATTGCCGATCTGGGTGT  
GTATGAAATCTCTGTTGAACCGGTGGTTGAAAAGGATGACAAAGATTACACCTGAAAGAAGAACACC  
TGGATCGTATTTTCGAAGAATATGACCGCCTGGCAGAAGAATATATCCGTCGCTACGAAGAAGGCCGT  
CCGTTTCGCTTTCTACCATTTCAAGATCGATCTGAAAGGCGGTCCGTGCATCAAAAAGCGCCTGCAGGG  
CTGTGGTGCAGGCTTCAATATATTGCTGTGACGCCGGATGAAGAAATCTACCCGTGCCACCAATTTG  
TTGGTATTGAAGAATTCAAACTGGGTACCCTGGATGAAGGCATTACGAACATCGAACTGCAGCGTAAG  
TTTATGGAAAGCGACATCTATAAACGTGAAGAATGCGCAAATGTTGGGCTCGCTTTTATTGCTCTGG  
CGGTTGTTTCGCAAACAACACTACAACATCAACGGCGATATCAACAAGCCGTATAAACTGGCTTGTGAAA  
TGCAGAAACGTGCAATTGAAAAATGCAATTGCTATCAAGGCATACCTGACCCCTGCGTGGTGAAAAAGGC  
GATTATCAGCGTGTGCAACGCGACAAAGCGGCCAACC**CGCTAACTCGAG**

b) MGSSHHHHHHSSGLVPRGSHMSATMHKFKRLGLNIIVDPVSGAIHVVDVVDVLDVLDYYENHSREEIVN  
LLKDKYKEEDILEAISEVDELKGNLLFTEDIYKDIAISRADSVIKAMCLNVAHDCNLRCKYCFASTG  
NFKGGRKLMDFETGRKAIDFLIKSSGKRRNIEIDFFGGEP LLNFEVVKQLVEYKQKAKENKKNIKFT  
ITTNVAVLLDDEKIEYFNENFSNVVLSLDGRKEVNDQMRVRADGSGTYDVIIVPKIQKFVKARGKKEYYV  
RGTFTAKNLDVFDVLDLHIADLGVYEISVEPVVEKDDKYTLKEEHLDRIFEEDRLAEYIRRYEEGR  
PFAFYHFKIDLKGGPCIKKRLQCGAGFEYIAVTPDEEIPCHQFVGIIEFKLGTLDIGITNIELQRK  
FMESDIYKREECANCWARFYCSGGCFANNYNINGDINKPYKLACEMQKRRIENAIKAYLTLRGEKG  
DYQRVQRDKAANR

c) ATGGGCAGCAGCCATCATCATCATCATCACAGCAGCGGCCTGGTGCCGCGCGGCAGCC**CATATG**CGTGC  
CATTATCACCATTAACAAACCGACGCTGCGTGAAAGTCTGAAAAAGCCGGGCTGCGGTGAATGTCAGG  
CGAGCTGCCAATCTGCCTGTAAGACCAGCTGCACGGTGGGCAACCAGGAATGTCAATATAAT**TAAC**T****  
**GAG**

d) MGSSHHHHHHSSGLVPRGSHMRRIITINKPTLRESLKKPGCGECQASCQSACKTSCTVGNQECQYN



**Figure S2.** Purification of Tte1186a and Tte1186. **A.** Tte1186 maturase (lane 2) and Tte1186a peptide (lane 3) were purified by affinity chromatography to 95% homogeneity as determined by SDS-PAGE analysis. Lane 1 is the molecular weight marker. **B.** UV-visible spectra of as-isolated Tte1186 (red), reconstituted Tte1186 (black), and reconstituted Tte1186 after size exclusion chromatography (blue). **C.** Mass spectrum of purified Tte1186a peptide. The various charge states of the peptide are indicated above the respective peaks. **D.** Deconvoluted and deisotoped mass spectrum of Tte1186a generated from **C** using Xtract software (Thermo Fisher). **E.** Zoomed in view of the deconvoluted and deisotoped spectrum in **D**. The peak with  $m/z = 7108.3298$  corresponds to the monoisotopic  $[M+H]^+$  of Tte1186a. The other peaks correspond to oxidized peptide (+O) and/or potassium (+K) adducts, as indicated above the respective peaks.

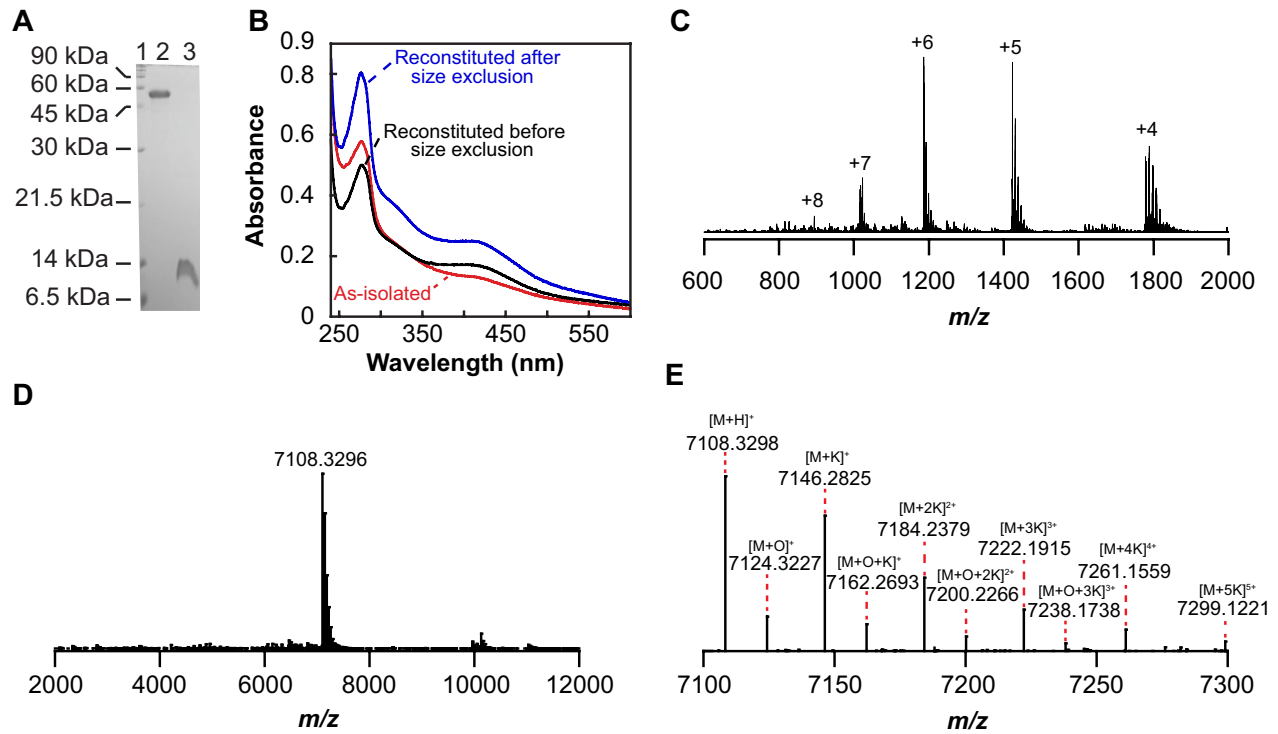

**Figure S3.** Clustal Omega sequence alignments between anSME from *Clostridium perfringens* ATCC 13124 (gi 122959045), QhpD from *Paracoccus denitrificans* PD1222 (gi 119374208), Tte1186 from *C. subterraneus* subsp. *tengcongensis* MB4 (gi 20516186), and Alba from *Bacillus subtilis* subsp. *subtilis* str 168 (gi 27734208). The CxxxCxxC RS signature sequence is highlighted by the blue box and the seven conserved Cys residues in the C-terminal SPASM domain are highlighted by the red box. Each of the seven conserved Cys residues in anSME were observed binding either AC1 or AC2 in the crystal structure.<sup>1</sup>

|         |                                                                   |     |
|---------|-------------------------------------------------------------------|-----|
| Alba    | MFIEQMFPFINESVRVHQLPEGGVLEIDYLRDNVSI SDFEYLDLNKTAYELCMRMDGQKT     | 60  |
| anSME   | -----                                                             | 0   |
| Tte1186 | -----MSATMHKFKR---LGLNIVVDPVSGAIHVDDVVYDVL DYENHSREEI             | 46  |
| QhpD    | -----MGALTLIRHNAHRVDV---DGHAMLMHVPTTSLFELDGVARDVYDLFRRAPAVD-      | 51  |
| Alba    | AEQILAEQCAVYDESPEDHKDWY--YDMLNMLQNKQVIQLGNRASRHTITTSGSNEFPMP      | 118 |
| anSME   | -----MPPL                                                         | 4   |
| Tte1186 | VNLLKDK-Y-----KEEDI---LEAISEVDELKGNLLFTEDI-YKD---IAISRADSVI       | 93  |
| QhpD    | PDLMRAE-LG-PRHGPDTLSECLQSFLALDILRNAE---AADI-PR----PVVKVEE IPL     | 101 |
| Alba    | LHATFELTHRNLKCAHCYLESSPEALGTVSI--EQFKKTADMLFD-----NGVLTCEI        | 170 |
| anSME   | SLLIKPASSGCNLKCTYCFYHLSDNRRNVKSYGIMRDEV--LESMVKRVLNEANGHC SF AF   | 63  |
| Tte1186 | KAMCLNVAHCNLRCYCFASTGNFKGGRKLMDFETGRKAIDFLIKS--SGKRRNIEIDF        | 151 |
| QhpD    | STIILNVNVCNLACTYCYKEDLTPAKGQKMGFETAKASFELLLKQ--AHARDRVNVVF        | 159 |
|         | *** * :*                                                          |     |
| Alba    | TGGEIFV--HPNANEILDYVCK-----FKKVAVL TNGTLMRKESELELLKTYKQKIIVG      | 222 |
| anSME   | QGGEPTLAGLEFFEKLMELQRKHNYK-NLKIYNSLQTNGLIDESWAKFLSEN--KFLVG       | 120 |
| Tte1186 | FGGEPLL-NFEVVKQLVEYKQKAKENKKNIKFTITTNALLDDEKIEYFNEN--FSNVV        | 208 |
| QhpD    | FGGEPLS-NMPLIRELVAYARPAEELGKAVDFSLTTNATLLTPELVDFDAH--RFALT        | 216 |
|         | *** . : : : : : * : * . * : . . : . :                             |     |
| Alba    | ISLDSVNSEVHDSFRGR--KGSFAQTCKTIKLLSD---HGIFVRVAM-----S             | 265 |
| anSME   | LSMDGP-KEIHNLRKDCCLDFTFSKVERAAELFKYKVEFNILCVVTSNTARHVNKVYK        | 179 |
| Tte1186 | LSLDGR-KEVNDQMRVRADGSGTYDVI VPKIQKFKARGKKEYVVRG-----              | 254 |
| QhpD    | VSMGDP-KALHDANRKTVGGKTYDLVARNVRMLLSRYRSRPVGGRV-----               | 262 |
|         | : * * . . : : * : : : . : . :                                     |     |
| Alba    | VFEK---NMWEIHDMAQKVRDLGAKAFSYNWVDDFGRGRDIVHPTKDAEQ-----           | 312 |
| anSME   | YFKEKDFKFLQFINCLDPLYEEKGYNSLQPKD-----YTKF---LK                    | 219 |
| Tte1186 | TF---TAKNLDVVEDV-LHIADLGVYEISVEPVVE---KDDKDYTLKEEHLDRIFEEYD       | 306 |
| QhpD    | TL---TRGVTDVIGIHDHLKNELGFEVGFPGPATS---GPIAVFNLDAAELKRAFEDMK       | 315 |
|         | : : : * .                                                         |     |
| Alba    | -----HRKFMEYEQHVIDEFKDLIPIIPYERKRAANCG---AGWKSIVISPFGEVRI CA      | 363 |
| anSME   | NLDFWFYEDFLNGNRVSI RYFDG LLETILGKS--SSCGMNGTCTCQFVVESDGSVYPCD     | 277 |
| Tte1186 | RLAE EYI RRYEGRPF AFYHFKIDLKGGPCIKKRLQCCG---AGFEYI AVTPDEE IYPC H | 363 |
| QhpD    | TLGRRYVEAACRGENIGFSNMHQLLTDIAQGTKKAVCG---AGLGMLAVDKDGELHLCR       | 372 |
|         | . . . : : . : * : : : : : * : : : * :                             |     |
| Alba    | LFP--KEFSLGNI FHDSYESIFNSPLVHKLWQAQAPRFSEHC MKDKCFPSGYC-GCCY LK   | 420 |
| anSME   | FYV-LDKWRLGNIQDMTKELFETNKNHEF IKLSF-KVHEFC--KCKWFRICXGCCRRC       | 333 |
| Tte1186 | QFVGIIEFKLGTLDGEGITN---IELQRKFMESDI-YKREFC--ANCWARFYCSGCCPAN      | 416 |
| QhpD    | RFVGSNQPTYGNVAKGIDI---PKLAGFIETAQD-RSAYCC--KTCRIRSCAGCCYHE        | 425 |
|         | : . : * . : : : : * : * : * * * :                                 |     |
| Alba    | GLNSNKYHRK---NICs---WAKNE-QLEDVVQLI-----                          | 448 |
| anSME   | RDSK-EDSALELNYYCSYKEFFEYAFPR-----LINVANNIK-----                   | 370 |
| Tte1186 | NYNINGDINKPYKLCSEMQRRIENAI AIKAYLTRGEGDYQRVQRDKAANR-----          | 469 |
| QhpD    | SYARQGDFFAPVWHYCDLMRDWVDFG--IESYVRIMQANPSFFRSQLEPRIARSGTAREV      | 483 |
|         | * . : :                                                           |     |
| Alba    | -- 448                                                            |     |
| anSME   | -- 370                                                            |     |
| Tte1186 | -- 469                                                            |     |
| QhpD    | LQ 485                                                            |     |

**Fig S4.** Continuous wave X-band EPR Component analysis. **A)** EPR of the FeS clusters present in the  $\Delta RC/\Delta AC2$  variant in the absence of SAM (black) can be well simulated with two components (summed simulation in red), AC1a (fuchsia, 81%) and AC1b (blue, 19%). **B)** The  $\Delta RC/\Delta AC1$  variant in the absence of SAM (black) can also be well simulated (summed simulation in red) with two components, AC2a (teal, 63%) and AC2b (green, 37%). Simulations were carried out using EasySpin, using a least squares fit varying the three principle  $g$ -values,  $g$ -strain ( $\sigma$ ), and the percent composition for each component. X-band CW spectra were recorded at  $T= 10$  K, 9.4 GHz microwave frequency, 10G modulation amplitude, 100  $\mu$ W microwave power.

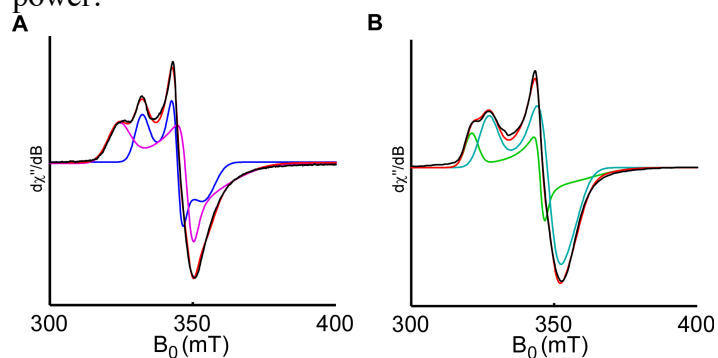

**Figure S5.** Proposed mechanisms for thioether bond formation. Mechanism (A) postulates simultaneous H-atom abstraction from two positions followed by bond formation. Such a di-radical mechanism is unlikely as highly unstable intermediates are being generated simultaneously, and requires the ability of the enzyme to generate two dAdo•. Mechanism (B) is more commonly discussed and requests that the peptide-based radical combine with the Cys side-chain, followed by electron transfer to an as yet identified cluster (either RS or Aux). While this is more plausible, the fact that the regiochemistry of the reaction can be either *si*- or *re*- in the same substrate, such as in SboA (C), makes this highly unlikely. For example, the RS enzyme AlbA introduces three crosslinks into its peptide substrate (SboA). As (C) shows, comparison of the NMR structure of the substrate reveals that the enzyme introduces two regiochemically distinct crosslinks using the same active site. The amide nitrogen (blue) and the carbonyl oxygen (red) of the peptide bond are shown as spheres to help visualize the change in stereochemistry. (C) was generated using PyMol<sup>2</sup> using the PDB coordinates 1PXQ<sup>3</sup>.

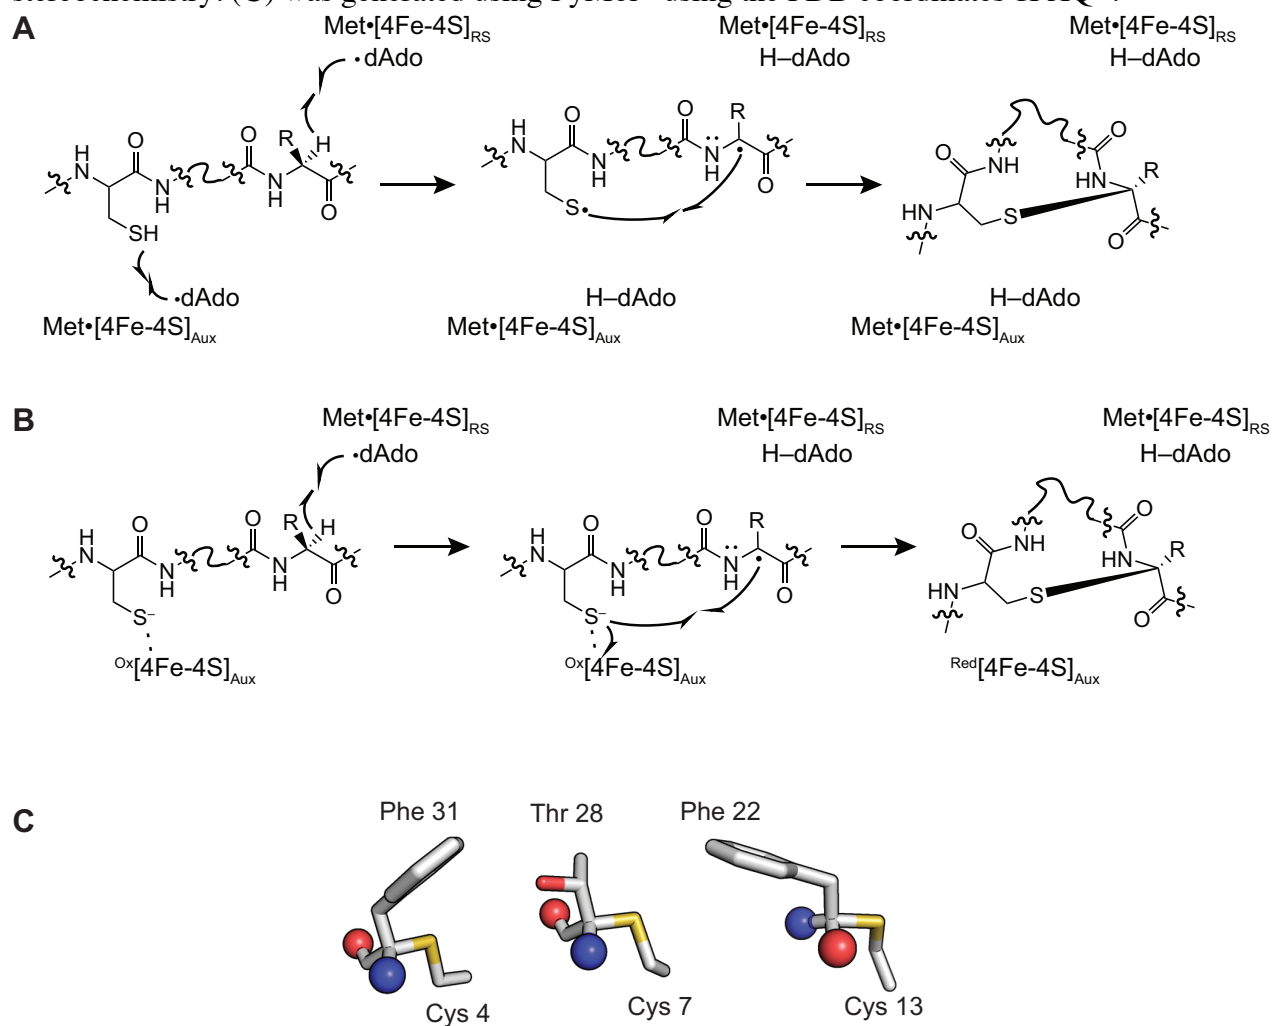

## Supplemental References

- (1) Goldman, P. J., Grove, T. L., Sites, L. A., McLaughlin, M. I., Booker, S. J., and Drennan, C. L. (2013) X-ray structure of an AdoMet radical activase reveals an anaerobic solution for formylglycine posttranslational modification. *Proc Natl Acad Sci U S A* 110, 8519–8524.
- (2) Delano, W. L. (2002) The PyMOL Molecular Graphics System. *pymol.org*. DeLano Scientific, Palo Alto, CA, USA.
- (3) Kawulka, K. E., Sprules, T., Diaper, C. M., Whittal, R. M., McKay, R. T., Mercier, P., Zuber, P., and Vederas, J. C. (2004) Structure of subtilisin A, a cyclic antimicrobial peptide from *Bacillus subtilis* with unusual sulfur to alpha-carbon cross-links: formation and reduction of alpha-thio-alpha-amino acid derivatives. *Biochemistry* 43, 3385–3395.
